# Supplementary material for: Individual bat viromes reveal the co-infection, spillover and emergence risk of potential zoonotic viruses
Source: Research Square preprint supplement (doi:10.21203/rs.3.rs-2301793/v1), 2022-11-23
Supplement: Supplementary file [file 65fed767bdf268f19cef2461.pdf]

- 1 **Supplementary Materials**
- 2 Supplementary figures S1 ~ S4
- 3 Supplementary tables S1 ~ S5
- 4

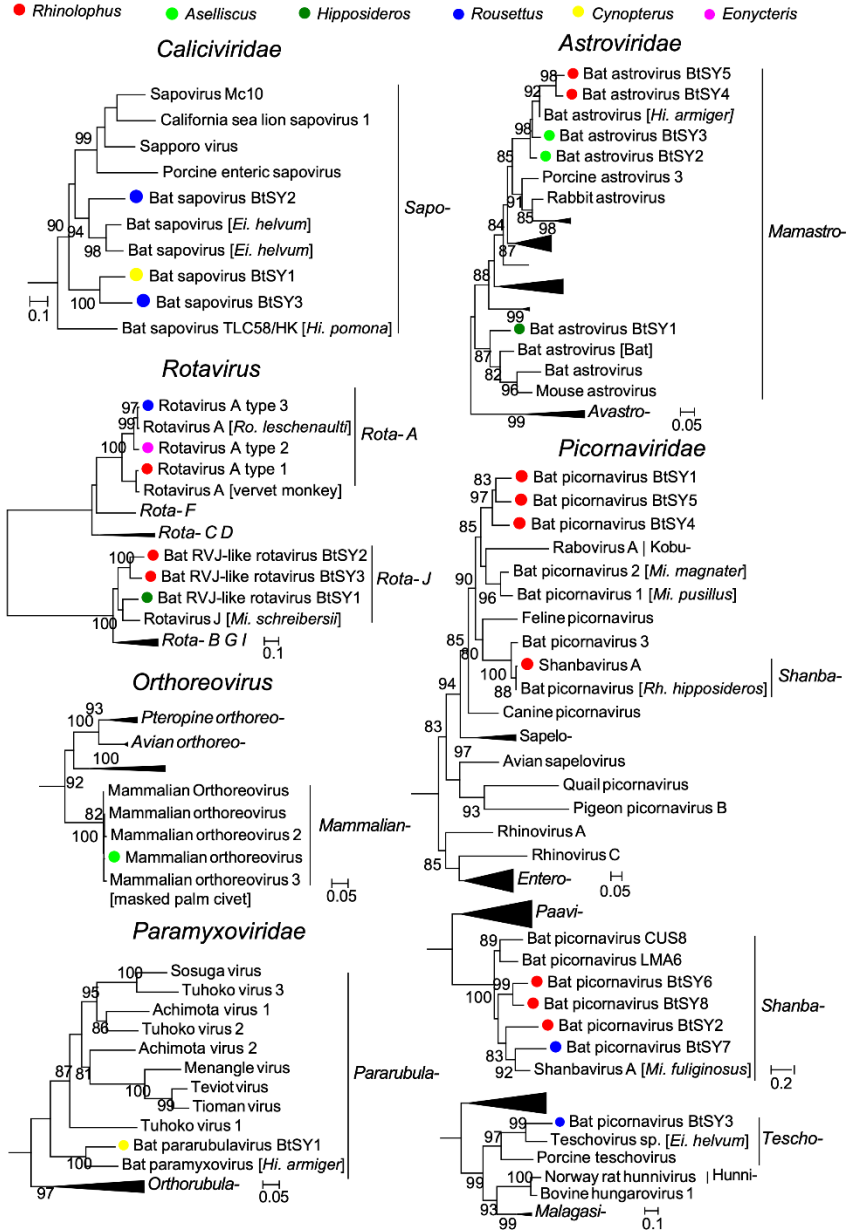

6

7 **Fig. S1** | The evolutionary relationships of the RNA viruses identified in this study. The  
 8 phylogenetic trees were estimated using a maximum likelihood method based on the  
 9 RdRp protein. All trees were midpoint-rooted and the branch length indicates number of  
 10 nucleotide substitutions per site. For clarity, only support values >80% are shown. Dots  
 11 indicate viruses detected in our samples and colors represent host genus.

12

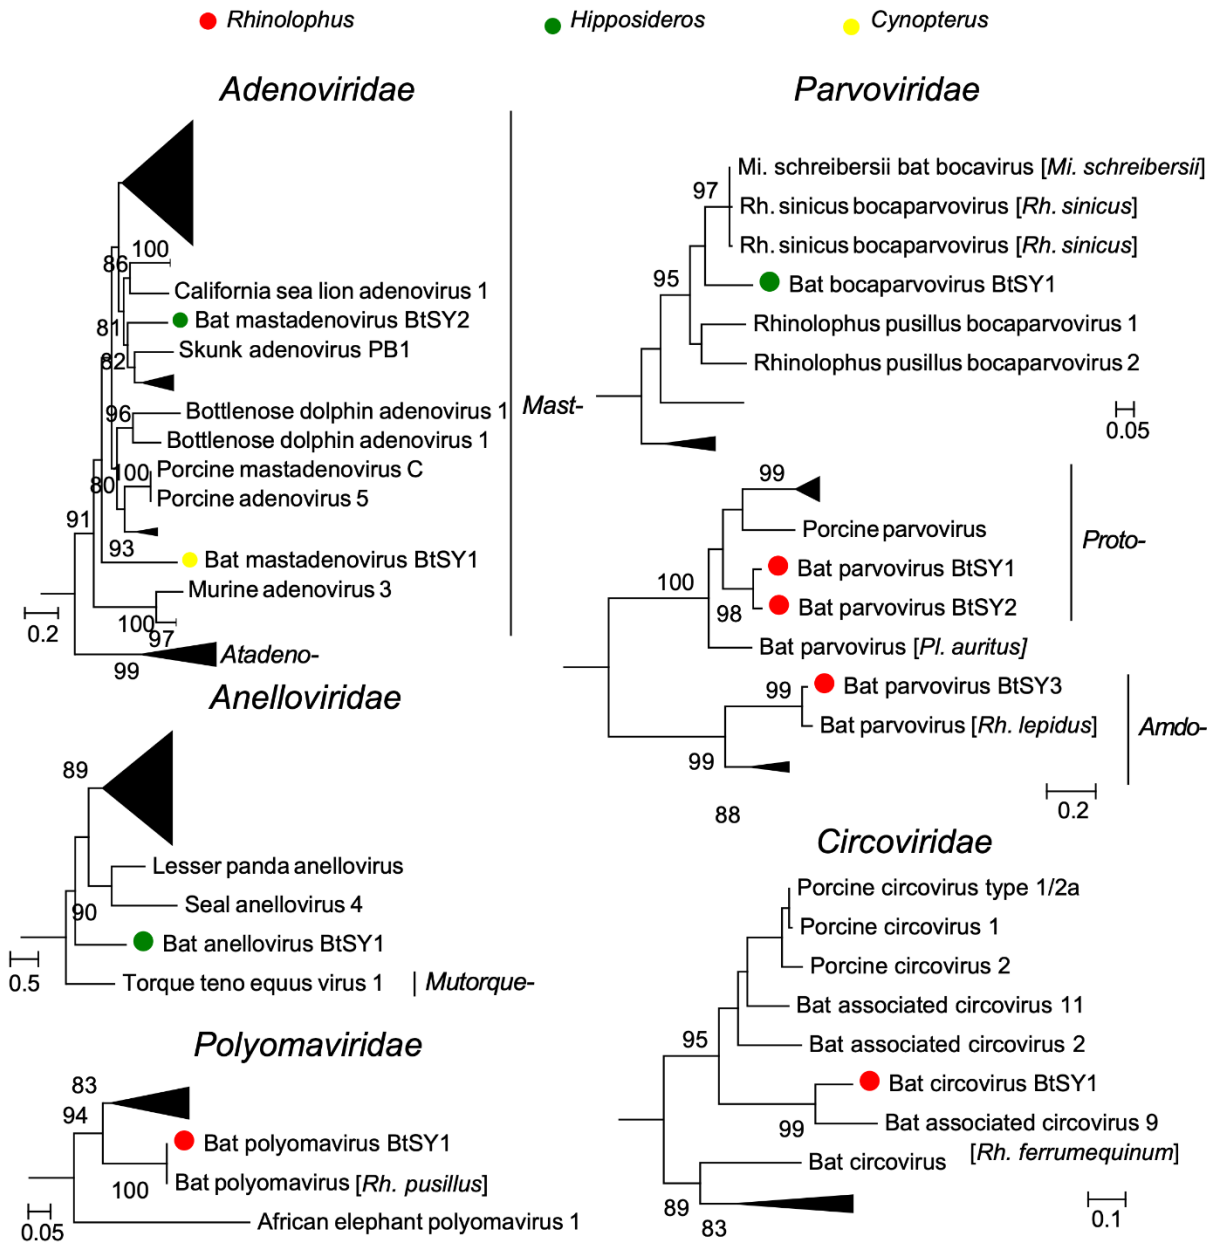

13  
14

15 **Fig. S2** | The evolutionary relationships of the DNA viruses identified in this study.  
 16 These phylogenetic trees were estimated using a maximum likelihood method based on  
 17 DNA pol or LTA<sub>g</sub> (*Polyomaviridae*), ORF1 (*Anelloviridae*), and NS1 (*Parvoviridae*)  
 18 protein. All trees were midpoint-rooted, and the branch length indicates number of  
 19 nucleotide substitutions per site. For clarity, only support values >80% were shown.  
 20 Dots indicate viruses detected in our samples, and colors represent host genus.

21

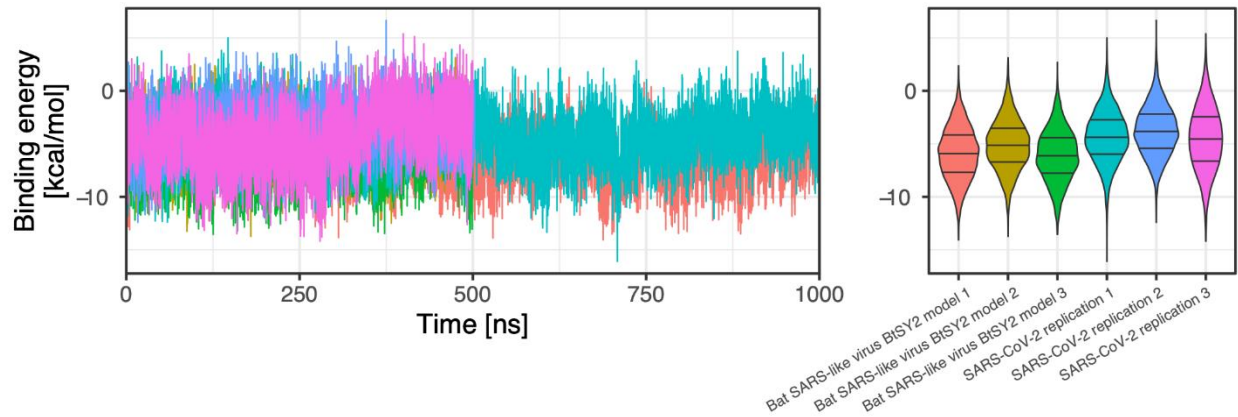

22

23

24 **Fig. S3 |** The predicted binding energy of the RBD-hACE2 complex in the duration of  
 25 MD simulations. Two 1000-ns-long main simulations and four 500-ns-long replications  
 26 were performed. These results showed that Bat SARS-like coronavirus BtSY2 RBD can  
 27 consistently bind to hACE2, and the binding energy is slightly lower than human SARS-  
 28 CoV-2, suggesting higher affinity.

29

30

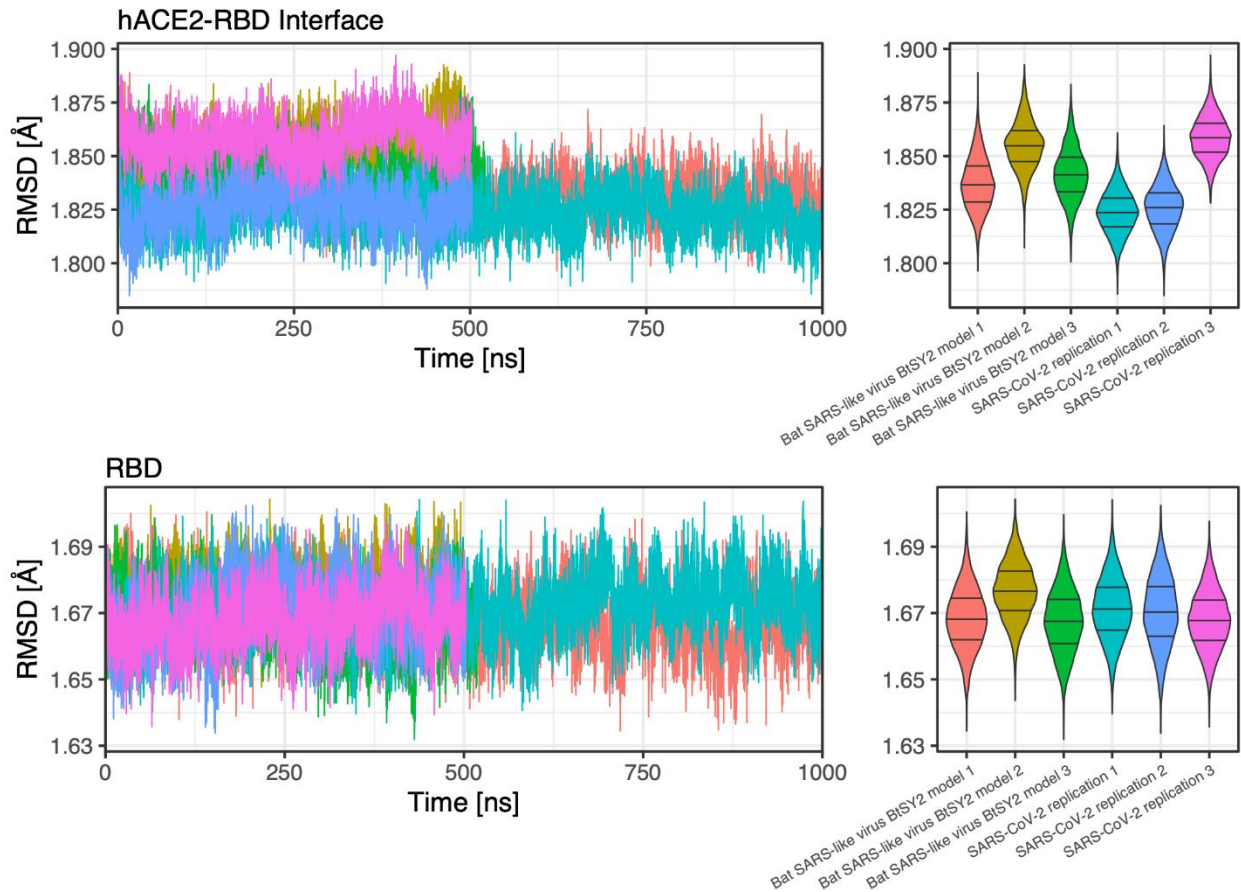

31  
32

33 **Fig. S4** | The deviation in protein backbone position during the MD simulations. RMSD  
 34 is the abbreviation of root-mean-square deviation of atomic positions. We used  
 35 backbone (C, N and O atoms in the main chain) RMSD to reflect the stability of RBD-  
 36 hACE2 binding. Bat SARS-like coronavirus BtSY2 displayed similar binding stability with  
 37 human SARS-CoV-2, regarding the RBD and RBD-hACE2 interface.

38 **Supplementary tables**

39 **Table S1 ~ S3.** Please refer to corresponding spreadsheet files (excel).

40

41 **Table S4. Partial Mantel tests showing the effect of host phylogenetic distance,**  
 42 **geographic distance and time interval on virome similarity.**

| Variable              | Coefficient of correlation | P value |
|-----------------------|----------------------------|---------|
| Phylogenetic distance | 0.245                      | <0.001  |
| Geographic distance   | 0.170                      | <0.001  |
| Time interval         | 0.048                      | 0.135   |

43

44 **Table S5. Identification of five viruses of concern and their prevalence among**  
 45 **bats.**

| Virus name                            | Closest known human or livestock pathogen (amino-acid identity%)  | Bat host species        | Prevalence (positive/total individuals) |
|---------------------------------------|-------------------------------------------------------------------|-------------------------|-----------------------------------------|
| Bat SARS-like virus BtSY1             | SARS-CoV Tor2 (99.6%, RdRp)                                       | <i>Rh. thomasi</i>      | 2 / 14                                  |
|                                       |                                                                   | <i>Rh. macrotis</i>     | 1 / 2                                   |
| Bat SARS-like virus BtSY2             | SARS-CoV Tor2 (99.1%, RdRp)<br>SARS-CoV-2 Wuhan-Hu-1 (97.4%, RBD) | <i>Rh. marshalli</i>    | 1 / 7                                   |
|                                       |                                                                   | <i>Rh. pusillus</i>     | 1 / 16                                  |
| Rhinolophus bat coronavirus HKU2-like | SADS-CoV GDWT-P83 (99.5%, RdRp)                                   | <i>Rh. thomasi</i>      | 1 / 14                                  |
|                                       |                                                                   | <i>Rh. pusillus</i>     | 1 / 16                                  |
| Mammalian orthoreovirus               | Porcine reovirus SHR-A (99.1%, RdRp)                              | <i>As. stoliczkanus</i> | 3 / 35                                  |
|                                       |                                                                   | <i>Hi. armiger</i>      | 3 / 11                                  |
|                                       |                                                                   | <i>Hi. larvatus</i>     | 1 / 13                                  |
|                                       |                                                                   | <i>Rh. macrotis</i>     | 1 / 2                                   |
| Rotavirus A type 1                    | Human rotavirus AU-1 (98.1%, RdRp)                                | <i>As. stoliczkanus</i> | 9 / 35                                  |
|                                       |                                                                   | <i>Rh. thomasi</i>      | 1 / 14                                  |
|                                       |                                                                   | <i>Rh. pusillus</i>     | 1 / 16                                  |
|                                       |                                                                   | <i>Rh. marshalli</i>    | 1 / 7                                   |
|                                       |                                                                   | <i>Rh. pearsonii</i>    | 1 / 2                                   |

46

47
